# Supplementary material
Source: Royal Society of Chemistry journal article supplement (doi:10.1039/d6cp00232c)
Supplement: d6cp00232c2.xlsx [file d6cp00232c2.xlsx]

## Sheet: GMTKN55_All
Functional	DH24	\omegaDSD72-PBEP86-D4	\omegaB97M(2)	Pr^2SCAN69-D4	\omegaB97X-2-D3(BJ)	DSD-BLYP-D3(BJ)	wB97X-L-V	DSD-PBEP86-D3(BJ)	B2NC-PLYP-D3(BJ)	B2GPPLYP-D3(BJ)	DSD-PBEB95-D3(BJ)	B2PLYP-D3(BJ)	PWPB95-D3(BJ)	mPW2NC-PLYP-D3(BJ)	MPW2PLYP-D3(BJ)	mSD-PBEPBE	B2PPW91-D3(BJ)
WTMAD-2	1.72	2.08	2.13	2.81	2.97	3.08	3.08	3.14	3.21	3.26	3.5	3.93	3.98	4.01	4.08	7.76	8.66

## Sheet: GMTKN55_Barriers
Functional	\omegaDSD72-PBEP86-D4	\omegaB97M(2)	DH24	DSD-PBEB95-D3(BJ)	wB97X-L-V	Pr^2SCAN69-D4	DSD-BLYP-D3(BJ)	B2GPPLYP-D3(BJ)	\omegaB97X-2-D3(BJ)	PWPB95-D3(BJ)	DSD-PBEP86-D3(BJ)	B2NC-PLYP-D3(BJ)	MPW2PLYP-D3(BJ)	B2PLYP-D3(BJ)	mPW2NC-PLYP-D3(BJ)	mSD-PBEPBE	B2PPW91-D3(BJ)
WTMAD-2	1.14	1.66	1.69	2.26	2.46	2.92	3.04	3.24	3.25	3.39	3.52	3.84	4.22	4.9	5.61	10.66	13.76

## Sheet: GMTKN55_Basic
Functional	DH24	\omegaB97M(2)	\omegaB97X-2-D3(BJ)	DSD-PBEP86-D3(BJ)	DSD-BLYP-D3(BJ)	DSD-PBEB95-D3(BJ)	B2GPPLYP-D3(BJ)	B2NC-PLYP-D3(BJ)	\omegaDSD72-PBEP86-D4	Pr^2SCAN69-D4	wB97X-L-V	PWPB95-D3(BJ)	MPW2PLYP-D3(BJ)	B2PLYP-D3(BJ)	mPW2NC-PLYP-D3(BJ)	B2PPW91-D3(BJ)	mSD-PBEPBE
WTMAD-2	1.29	1.39	1.66	1.69	1.88	1.89	1.95	1.99	2.01	2.01	2.08	2.23	2.46	2.51	2.59	4.69	7.62

## Sheet: GMTKN55_Inter
Functional	DH24	\omegaDSD72-PBEP86-D4	\omegaB97M(2)	Pr^2SCAN69-D4	B2NC-PLYP-D3(BJ)	B2PLYP-D3(BJ)	wB97X-L-V	DSD-PBEB95-D3(BJ)	DSD-BLYP-D3(BJ)	PWPB95-D3(BJ)	DSD-PBEP86-D3(BJ)	B2GPPLYP-D3(BJ)	mPW2NC-PLYP-D3(BJ)	MPW2PLYP-D3(BJ)	\omegaB97X-2-D3(BJ)	mSD-PBEPBE	B2PPW91-D3(BJ)
WTMAD-2	1.92	2.33	2.44	3.05	3.53	3.78	3.87	3.9	3.92	4.02	4.25	4.28	4.74	4.75	5.26	5.89	11.62

## Sheet: GMTKN55_Intra
Functional	DH24	\omegaDSD72-PBEP86-D4	\omegaB97X-2-D3(BJ)	\omegaB97M(2)	Pr^2SCAN69-D4	DSD-BLYP-D3(BJ)	B2NC-PLYP-D3(BJ)	B2GPPLYP-D3(BJ)	DSD-PBEP86-D3(BJ)	mPW2NC-PLYP-D3(BJ)	MPW2PLYP-D3(BJ)	B2PLYP-D3(BJ)	wB97X-L-V	PWPB95-D3(BJ)	DSD-PBEB95-D3(BJ)	mSD-PBEPBE	B2PPW91-D3(BJ)
WTMAD-2	2.09	2.17	2.3	3	3.07	3.15	3.17	3.21	3.46	3.53	3.7	3.78	3.8	5.98	6.7	6.82	8.44

## Sheet: GMTKN55_LARGE_ISO
Functional	DH24	\omegaDSD72-PBEP86-D4	\omegaB97M(2)	\omegaB97X-2-D3(BJ)	DSD-PBEB95-D3(BJ)	Pr^2SCAN69-D4	wB97X-L-V	DSD-PBEP86-D3(BJ)	DSD-BLYP-D3(BJ)	B2GPPLYP-D3(BJ)	B2NC-PLYP-D3(BJ)	mPW2NC-PLYP-D3(BJ)	PWPB95-D3(BJ)	B2PLYP-D3(BJ)	MPW2PLYP-D3(BJ)	B2PPW91-D3(BJ)	mSD-PBEPBE
WTMAD-2	1.88	2.57	2.61	3.22	3.28	3.66	3.68	3.91	4.32	4.62	4.73	5.15	5.41	6.28	6.76	8.87	9.18

## Sheet: TMC_BDEs
Functional	\omegaB97M(2)	\omegaB97X-L-V	B2GGPLYP-D3	\omegaB97X-2-D3	B2NC-PLYP-D3	\omegaDSD72-PBEP86-D4	Pr^2SCAN69-D4
MAD	3.1279	3.7465	4.1093	4.9744	6.9256	6.9349	8.3767
MAX	13.6	23.7	29.8	45.2	54.1	47.7	44.7
