# Supplementary material
Source: Royal Society of Chemistry journal article supplement (doi:10.1039/d6cp00232c)
Supplement: d6cp00232c3.xlsx [file d6cp00232c3.xlsx]

## Sheet: Sheet1
								Errors (kcal/mol):
System	T1 Metric	we	wexe	SOC	BDE	Ref.	Ref. Error Margins	wB97X-L-V	wB97M(2)	Pr2SCAN69-D4	wDSD72-PBEP86-D4	B2NC-PLYP-D3	B2GPPLYP-D3	wB97X-2-D3
ScH	0.034	2.28157	-0.0173048	-0.33	53.1134	50	4	0	0	0.716411	1.70047	0	0	1.41582
ScO	0.037	1.38981	-0.002902	-0.55	165.168	161	0.2	3.96792	3.0715	1.80582	4.80902	3.15254	2.74798	6.57542
ScF	0.027	1.05119	-0.00269471	-0.7	141.342	143	3	0	0	0.733439	0	0	0	0.984741
ScS	0.043	0.807984	-0.0012866	-0.82	113.675	114.2	2.5	0	0.223289	1.86177	0.671752	0.334251	0	0
TiH	0.048	2.24054	-0.0175835	-0.19	48.0242	47.4	1.4	0	0.795834	2.12692	2.09109	3.59235	1.83832	0
TiN	0.091	1.50065	-0.00360963	-0.68	120.436	115	8	0	0	2.71961	0	0	0	0
TiO	0.047	1.44268	-0.00325939	-0.57	163.242	159.9	1.6	1.74248	2.8225	3.97762	1.25814	0	0.38935	4.59278
TiF	0.031	0.940647	-0.00285911	-0.88	131.999	136	8	0	0	5.98169	0.448331	0	0	0
TiS	0.072	0.803982	-0.00147244	-0.85	107.387	99.8	0.7	6.88734	5.98655	0	0.396975	0.38605	6.30638	6.00687
TiCl	0.03	0.5818	-0.00109361	-0.88	95.3735	101	2	3.62652	7.74081	12.1989	10.2328	8.38402	6.71211	6.70406
VN	0.105	1.47673	-0.00478901	-0.48	109.717	116.7	0.05	6.93316	9.14661	33.3013	22.8412	22.1286	10.2081	7.57383
VO	0.086	1.44571	-0.00347382	-1.17	153.226	150.9	2	0.326182	5.44867	12.8003	1.13399	2.06927	0	3.66727
VCl	0.084	0.596696	-0.00109361	-1.21	101.474	102.5	2	0	1.12671	6.5881	5.9434	5.29767	3.09076	3.48329
CrH	0.128	2.36741	-0.0217936	0	52.7816	51.1	1.6	0.0816092	4.22954	3.18388	3.16647	0	3.10848	3.57173
CrO	0.105	1.28431	-0.00482475	0.1	94.0298	104.8	1.4	9.37017	7.73514	19.525	16.3436	18.1665	10.8919	11.2555
CrF	0.073	0.949382	-0.00301636	-0.37	112.466	110.4	2.4	0	4.99641	4.73616	6.077	0	1.7376	3.97644
CrCl	0.116	0.572251	-0.0012866	-0.76	88.3747	90.6	1.3	0.925263	0.288798	0	0	4.19573	0.0312306	0
MnH	0.022	2.21131	-0.0197279	0	44.6521	41.1	1.4	2.15214	0.691736	0.264134	0	0.361454	0.358955	1.16913
MnO	0.087	1.20018	-0.00342378	-0.22	84.2907	89.3	1.8	3.20927	4.74289	17.3526	14.6089	19.1975	10.4061	8.63638
MnF	0.021	0.892328	-0.00228729	-0.37	111.719	107.3	1.8	2.61917	0	0	0	0	0	1.42771
MnS	0.057	0.701983	-0.00132949	-0.49	67.7504	72	4	0.249639	0	6.68705	7.52716	8.1501	3.15072	0.950105
MnCl	0.017	0.552237	-0.00107217	-0.76	86.8084	80.4	1.3	5.10838	2.41065	1.28559	0.273266	0.618651	0	2.35612
FeH	0.121	2.61866	-0.0249171	-0.02	42.5549	41.6	1.7	0	8.08317	3.91618	3.47251	2.82157	0	0
FeO	0.104	1.25859	-0.00330942	-0.17	88.3805	97.6	0.2	9.01946	1.34103	22.726	14.2919	14.0844	7.63511	4.75442
FeS	0.074	0.740509	-0.00121512	-0.42	67.1567	78	3	7.84329	0	12.5846	12.3791	12.5546	7.06379	6.3035
FeCl	0.027	0.583273	-0.00105787	-0.66	76.5635	79.9	1.3	2.03649	3.44143	4.56134	4.9416	3.89369	4.62658	2.09128
CoH	0.171	2.75122	-0.00105787	-0.22	45.3371	51	3	2.6629	6.85116	6.21164	7.29915	9.88059	1.58725	4.79494
CoO	0.126	1.23285	-0.00366681	-0.94	69.5128	95.3	2.1	23.6872	3.86466	38.6483	33.1987	38.6619	20.9587	29.0946
CoS	0.088	0.736221	-0.00114364	-1.23	67.9577	78.9	2.3	8.6423	2.94238	38.7496	34.0917	34.7337	8.30587	8.32142
CoCl	0.041	0.620127	-0.00119368	-1.01	76.2669	81.9	1.3	4.33308	1.26467	7.80085	0.9503	0.620996	2.62902	2.17384
NiH	0.045	2.86098	-0.0265111	-1.09	60.1753	59.2	1.9	0	1.05103	2.42458	2.44514	0.642106	1.39528	3.66818
NiO	0.142	1.20038	-0.00409568	-3.1	71.0662	90.3	0.7	18.5338	5.50171	44.6644	47.6796	54.1316	29.7636	45.2033
NiF	0.037	0.936359	-0.00428867	-2.36	98.5888	105.3	1.4	5.31122	5.87433	5.18425	2.1565	2.25744	3.823	0.414854
NiCl	0.039	0.608461	-0.00125086	-3	85.1274	88.7	1.3	2.27263	1.96631	1.64966	2.28398	0	0.0920141	0
CuH	0.044	2.77372	-0.026554	0	65.0424	62.7	1.4	0.942402	4.9166	5.38263	5.35097	3.494	3.85699	6.94722
CuO	0.053	0.915115	-0.00316646	0.1	64.0515	71	0.7	6.2485	1.42389	5.62064	3.36898	5.51088	4.62488	0
CuF	0.048	0.887568	-0.0024088	-0.37	96.3065	96.8	0.7	0	1.735	0	2.77311	2.22548	0.646553	5.14657
CuS	0.037	0.593022	-0.00151533	0.03	65.1968	65	3	0	1.00842	0	0	0	0.0776243	2.63962
CuCl	0.032	0.597039	-0.00115794	-0.76	86.1118	90.2	1	3.08817	0.73004	1.0193	1.45335	0.513792	1.44565	0
ZnH	0.024	2.29183	-0.0360963	0	25.6887	21.9	0.2	3.58875	3.68789	5.19527	2.99905	2.3367	2.52127	4.25114
ZnO	0.031	1.04429	-0.00262323	-0.22	34.759	38.2	0.9	2.54096	1.85413	2.62908	0.957906	0	0.794338	1.23392
ZnS	0.023	0.656523	-0.00164399	-0.49	33.3191	49	3	12.6809	13.6463	11.9562	12.8622	11.7719	11.615	11.086
ZnCl	0.018	0.560557	-0.00123657	-0.76	52.5976	55.3	1.9	0.802432	2.07779	1.5255	3.47995	1.47666	2.3824	1.1616
